# Supplementary material for: Experimental chemical budgets of OH, HO 2 , and RO 2 radicals in rural air in western Germany during the JULIAC campaign 2019
Source: Copernicus journal article supplement (doi:10.5194/acp-23-2003-2023), 2023-02-08
Supplement: Supplementary file 1 [file acp-23-2003-2023-supplement.pdf]

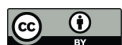

*Supplement of*

## **Experimental chemical budgets of OH, HO<sub>2</sub>, and RO<sub>2</sub> radicals in rural air in western Germany during the JULIAC campaign 2019**

**Changmin Cho et al.**

*Correspondence to:* Hendrik Fuchs ([h.fuchs@fz-juelich.de](mailto:h.fuchs@fz-juelich.de)) and Anna Novelli ([a.novelli@fz-juelich.de](mailto:a.novelli@fz-juelich.de))

The copyright of individual parts of the supplement might differ from the article licence.

16 **Table S1.** HO<sub>2</sub> and RO<sub>2</sub> background signals converted into apparent ambient concentrations used in the evaluation  
 17 of HO<sub>2</sub> and RO<sub>2</sub> measurements. The average background signals originate from the reference experiments in the  
 18 chamber while the upper limits are obtained from calibrations.

19

|           | HO <sub>2</sub><br>background<br>10 <sup>7</sup> cm <sup>-3</sup> | HO <sub>2</sub><br>background<br>upper limit<br>10 <sup>7</sup> cm <sup>-3</sup> | RO <sub>2</sub><br>background<br>10 <sup>7</sup> cm <sup>-3</sup> | RO <sub>2</sub><br>background<br>upper limit<br>10 <sup>7</sup> cm <sup>-3</sup> |
|-----------|-------------------------------------------------------------------|----------------------------------------------------------------------------------|-------------------------------------------------------------------|----------------------------------------------------------------------------------|
| 22 Winter | 0.4±0.6                                                           | 1.2                                                                              | 0.5±0.2<br>2.8±0.4 <sup>a</sup>                                   | 2.8                                                                              |
| 24 Spring | 1.0±0.15                                                          | 2.0                                                                              | 0.5±0.2                                                           | 2.5                                                                              |
| 25 Summer | 1.0±0.6                                                           | 2.1                                                                              | 2.8±0.5                                                           | 5.4                                                                              |
| 26 Autumn | 0.0±0.4                                                           | 1.5                                                                              | 0.0±0.4                                                           | 1.5                                                                              |

27

28 <sup>a</sup> Variable background signals that are equivalent to RO<sub>2</sub> concentrations: from 14 Jan. to 25 Jan.: (0.5±0.2) × 10<sup>7</sup> cm<sup>-3</sup>,  
 29 <sup>3</sup>, from 26 Jan. to 6 Feb.: (1.6±0.2) × 10<sup>7</sup> cm<sup>-3</sup>, from 07 Feb. to 10 Feb.: (2.8±0.4) × 10<sup>7</sup> cm<sup>-3</sup>.

30

31

32

33 **Table S2.** List of the used VOCs for the radical budget analysis.

| 34 | Classification | Species                                                                                                                                                                                                                                                              | Instrument        |
|----|----------------|----------------------------------------------------------------------------------------------------------------------------------------------------------------------------------------------------------------------------------------------------------------------|-------------------|
| 35 | alkenes        | pentene, hexene                                                                                                                                                                                                                                                      | VOCUS- PTR-TOF-MS |
| 36 |                |                                                                                                                                                                                                                                                                      |                   |
| 37 | aromatics      | toluene, xylene, benzene, phenol, furan, styrol, cresol                                                                                                                                                                                                              | PTR-TOF-MS        |
|    | BVOCs          | isoprene, monoterpenes, sesquiterpenes                                                                                                                                                                                                                               | VOCUS- PTR-TOF-MS |
|    | OVOCs          | acetaldehyde, acetone, acetonitrile, acrolein, adipinic acid, benzaldehyde, butanone, cyclohexanone, formic acid, glycolaldehyde, glycolic acid, hydroxyacetone, methylglyoxal, methyl vinyl ketone, methacrolein, nopinone, pentanone, pinonaldehyde, succinic acid | VOCUS- PTR-TOF-MS |

38 **Table S3.** Meteorological and trace gas conditions during the specific period for Case 1 and 2.

| Parameter                                                                      | Case 1 (05.08 - 08.08.2019) |               | Case 2 (22.08 - 31.08.2019) |               |
|--------------------------------------------------------------------------------|-----------------------------|---------------|-----------------------------|---------------|
|                                                                                | Median                      | Interquartile | Median                      | Interquartile |
| SAPHIR                                                                         |                             |               |                             |               |
| temperature (°C)                                                               | 27.0                        | 7.8           | 31.0                        | 9.1           |
| H <sub>2</sub> O (%)                                                           | 1.44                        | 0.25          | 1.4                         | 0.5           |
| OH (10 <sup>6</sup> cm <sup>-3</sup> )                                         | 4.5                         | 5.2           | 4.1                         | 5.7           |
| HO <sub>2</sub> (10 <sup>8</sup> cm <sup>-3</sup> )                            | 1.4                         | 1.4           | 2.7                         | 3.8           |
| RO <sub>2</sub> (10 <sup>8</sup> cm <sup>-3</sup> )                            | 2.1                         | 2.6           | 2.9                         | 3.1           |
| O <sub>3</sub> (ppbv)                                                          | 37.5                        | 11.3          | 57.5                        | 37.6          |
| NO (ppbv)                                                                      | 0.26                        | 0.39          | 0.22                        | 0.54          |
| NO <sub>2</sub> (ppbv)                                                         | 3.4                         | 2.2           | 4.3                         | 4.6           |
| CO (ppmv)                                                                      | 0.12                        | 0.01          | 0.16                        | 0.03          |
| HCHO (ppbv)                                                                    | 1.8                         | 0.7           | 3.4                         | 1.8           |
| HONO (ppbv)                                                                    | 0.18                        | 0.09          | 0.21                        | 0.15          |
| <i>k</i> <sub>OH</sub> (s <sup>-1</sup> )                                      | 5.2                         | 1.1           | 8.7                         | 3.4           |
| <i>k</i> <sub>voc</sub> (s <sup>-1</sup> )                                     | 3.3                         | 0.9           | 5.7                         | 3.4           |
| Total aerosol surface area (10 <sup>7</sup> nm <sup>2</sup> cm <sup>-3</sup> ) | 8.5                         | 2.5           | 11.2                        | 11.7          |

39

40

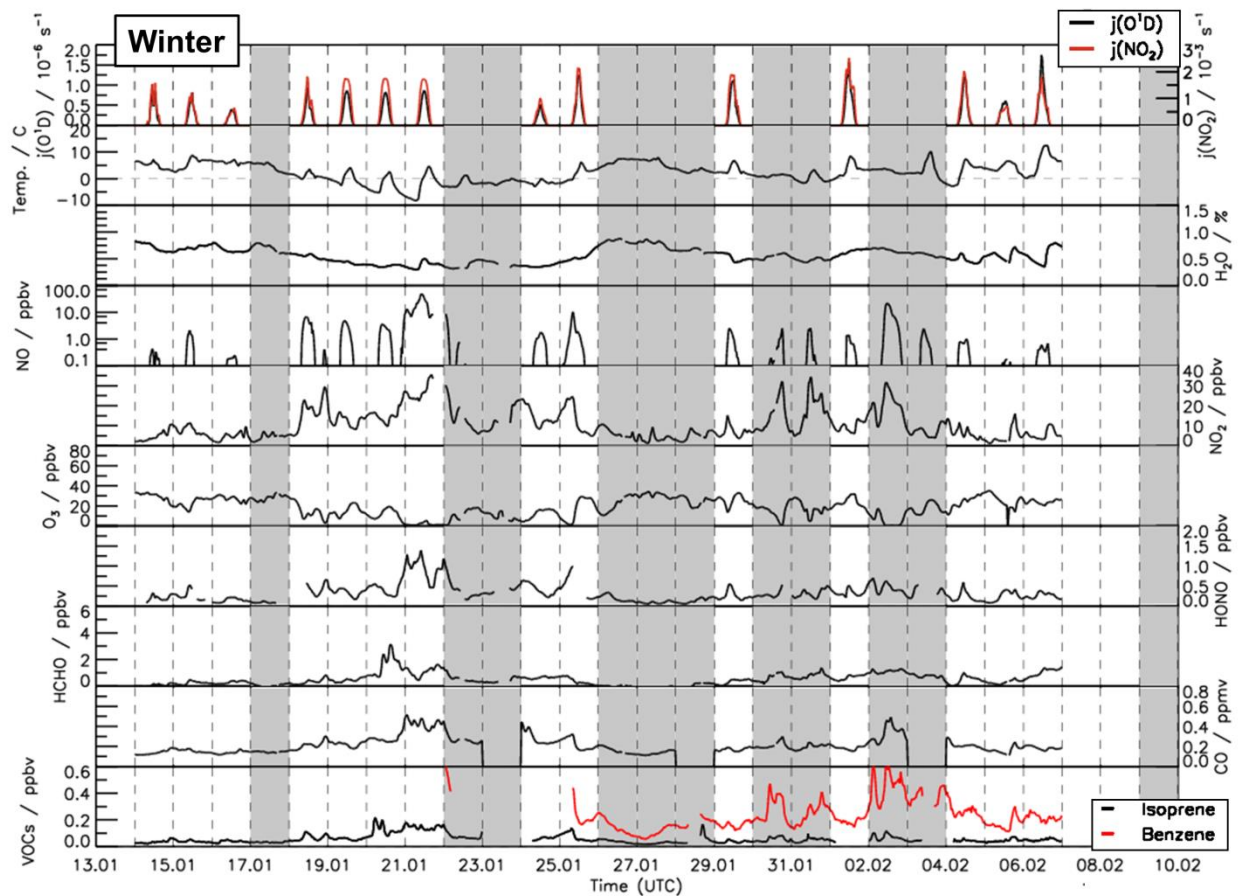

41 **Figure S1:** Time series of temperature and trace gas concentrations during the winter period of the  
 42 JULIAC campaign (Cho et al., 2022). Vertical dashed lines denote midnight. Grey shaded areas indicate  
 43 calibration days, when no measurements were done and days when the chamber roof was closed due to  
 44 bad weather conditions.

45

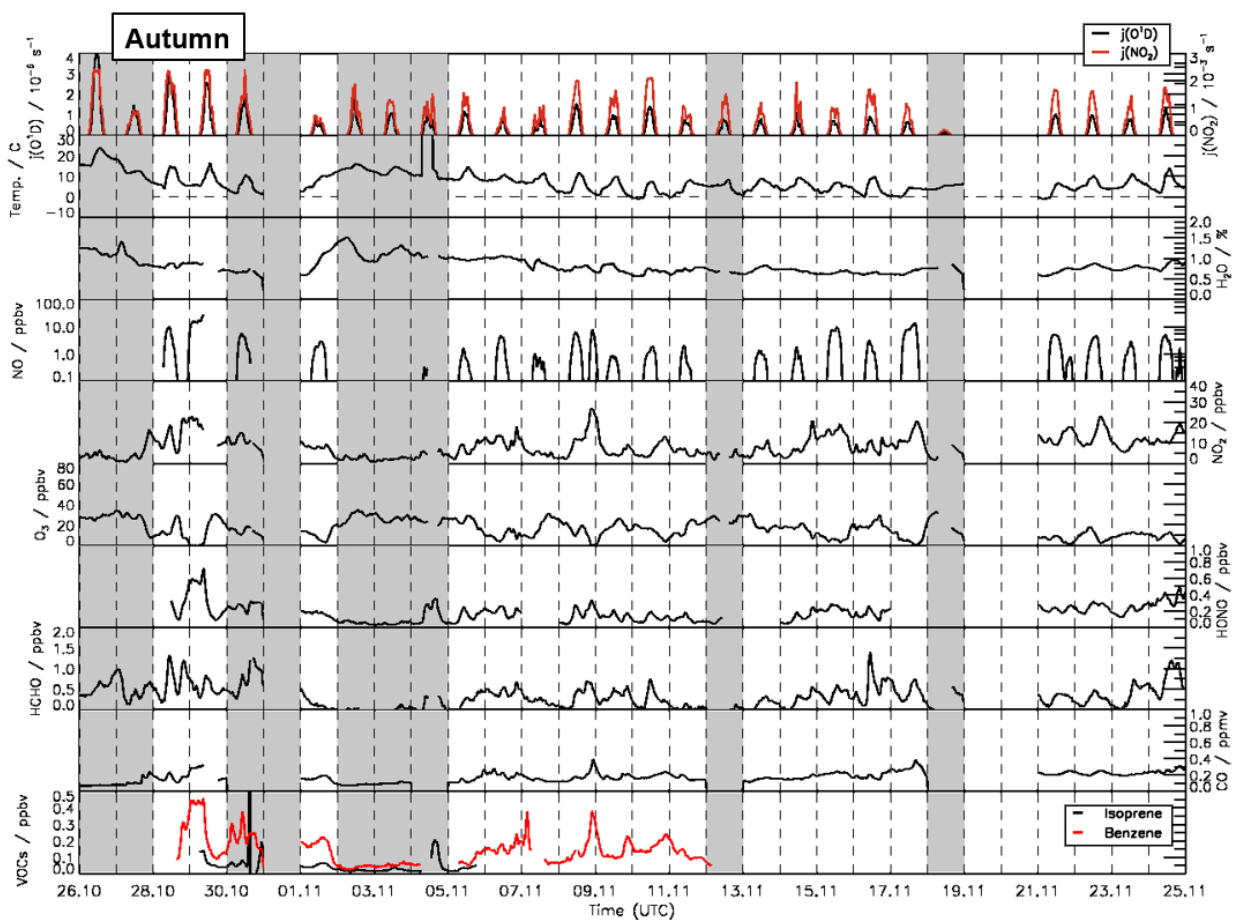

46 **Figure S2:** Time series of temperature and trace gas concentrations during the autumn period of the  
 47 JULIAC campaign (Cho et al., 2022). Vertical dashed lines denote midnight. Grey shaded areas indicate  
 48 calibration days, when no measurements were done and days when the chamber roof was closed to  
 49 bad weather conditions.

50

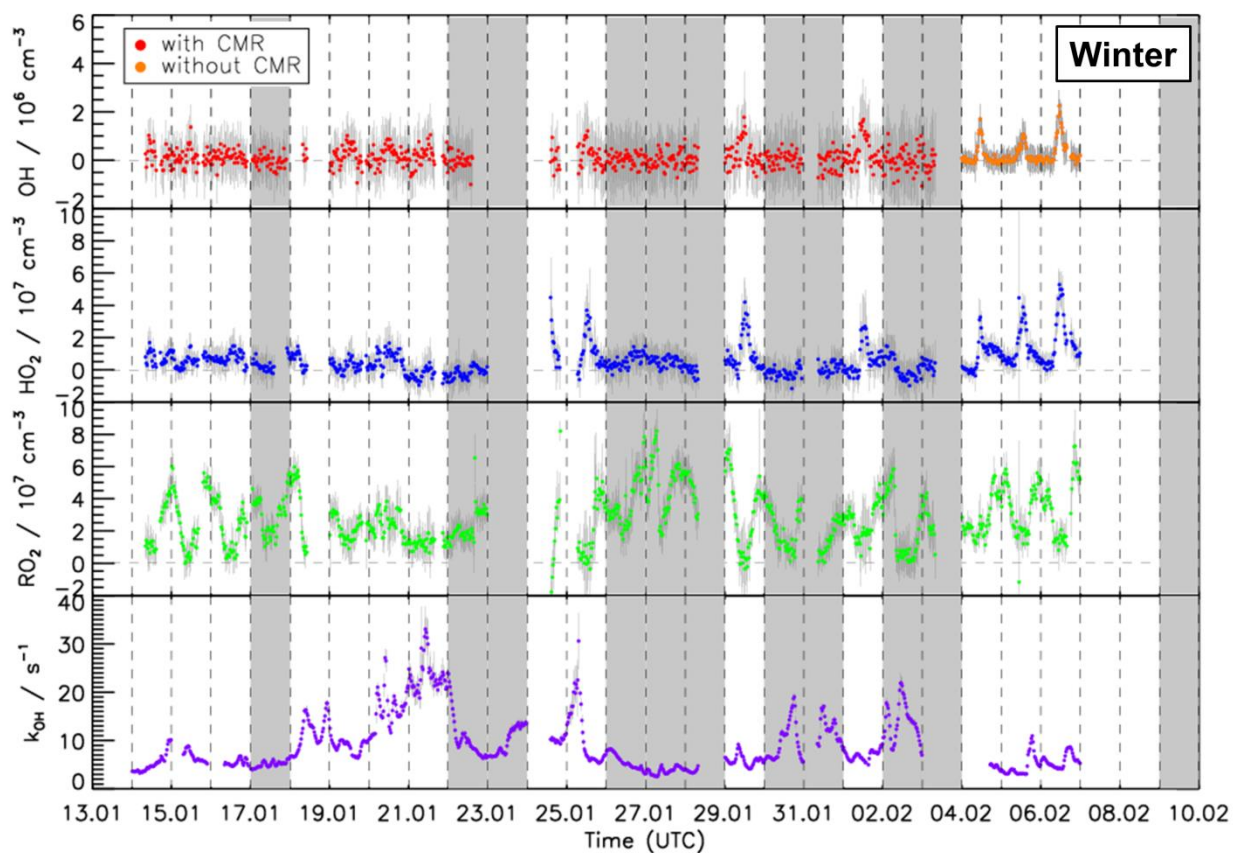

51 **Figure S3:** Time series of OH, HO<sub>2</sub>, and RO<sub>2</sub> radical concentration measured by the FZJ-LIF-CMR  
 52 instrument and measurements of the OH reactivity ( $k_{\text{OH}}$ ) measured in the winter period of the JULIAC  
 53 campaign (Cho et al., 2022). Vertical bars represent  $1\sigma$  statistical errors. Vertical dashed lines denote  
 54 midnight. Grey shaded areas indicate calibration days when no measurements were done and days when  
 55 the chamber roof was closed due to bad weather conditions.

56

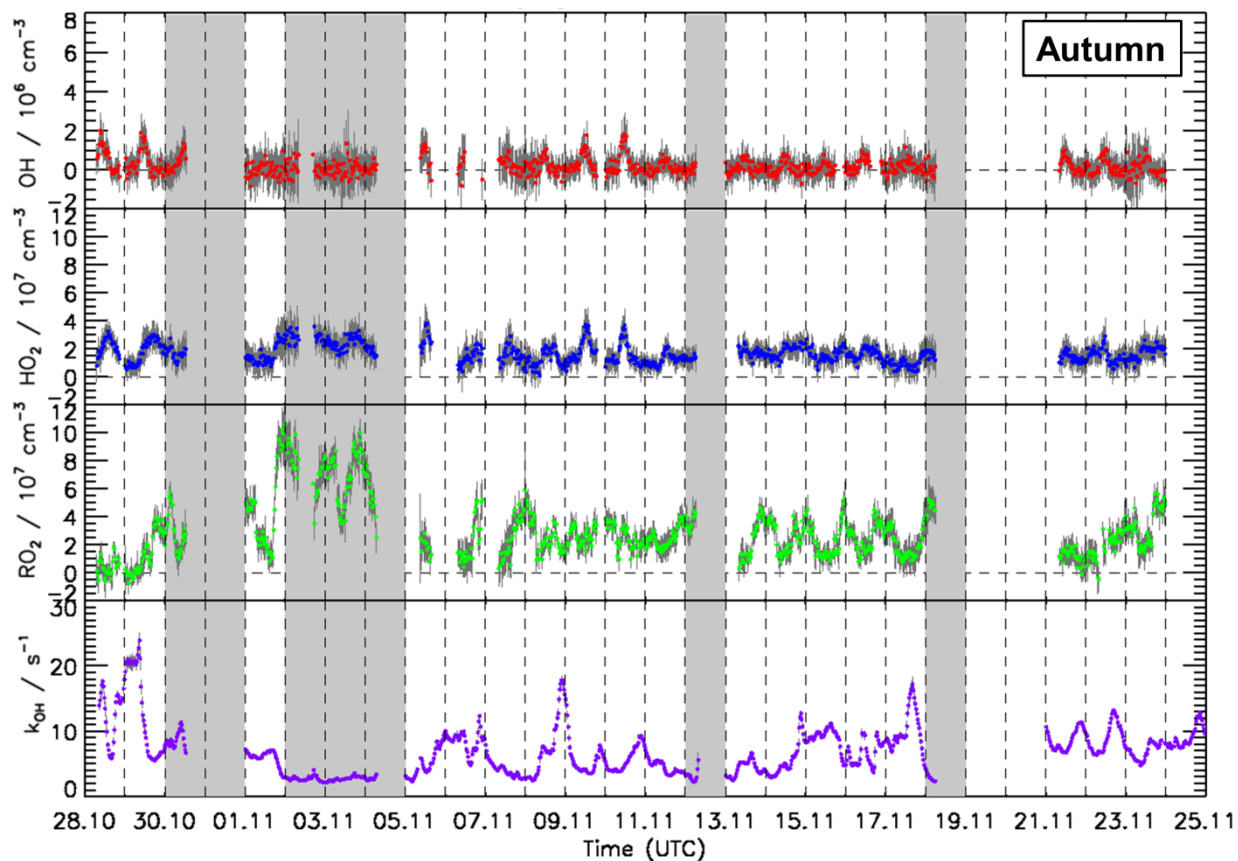

57 **Figure S4:** Time series of OH, HO<sub>2</sub>, and RO<sub>2</sub> radical concentration measured by the FZJ-LIF-CMR  
 58 instrument and measurements of the OH reactivity ( $k_{\text{OH}}$ ) measured in the autumn period of the JULIAC  
 59 campaign (Cho et al., 2022). Vertical bars represent  $1\sigma$  statistical errors. Vertical dashed lines denote  
 60 midnight. Grey shaded areas indicate calibration days when no measurements were done and days when  
 61 the chamber roof was closed due to bad weather conditions.



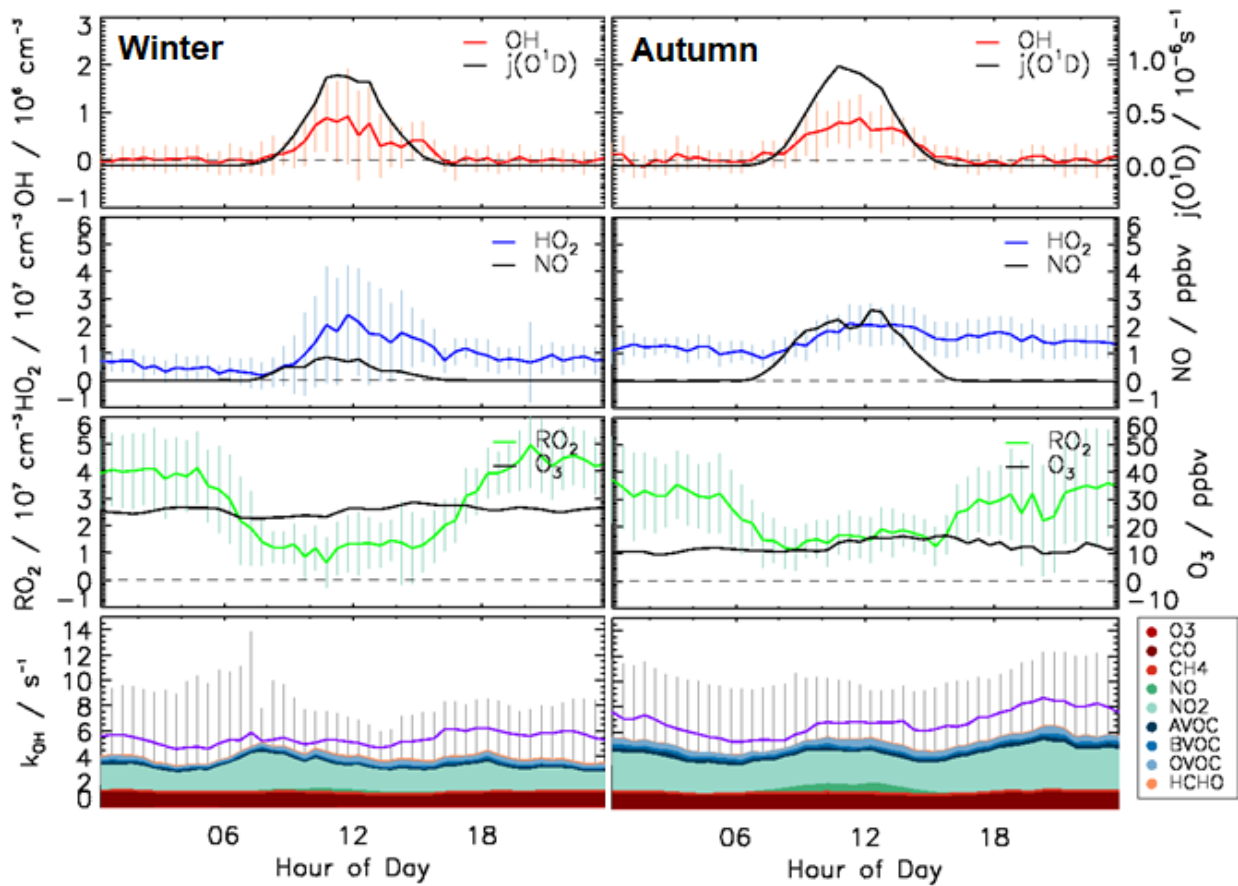

62 **Figure S5:** Median values of the diurnal profiles of OH, HO<sub>2</sub>, RO<sub>2</sub>, k<sub>OH</sub>, j(O'D), NO, O<sub>3</sub> measured in the  
 63 winter and autumn periods of the JULIAC campaign. Colored areas represent the contributions of  
 64 measured reactants to the total OH reactivity. Vertical lines give 25<sup>th</sup> and 75<sup>th</sup> percentile values.

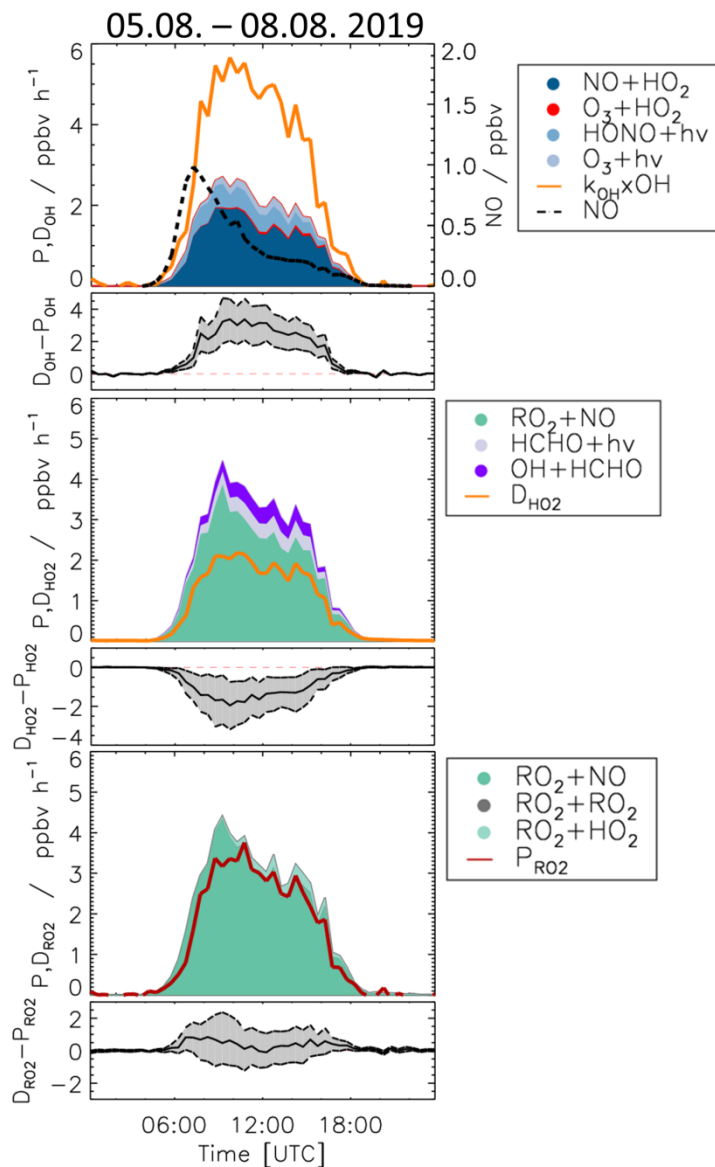

66 **Figure S6:** Chemical budgets for OH, HO<sub>2</sub>, and RO<sub>2</sub> radicals similar to Figure 12 (only Case 1), using the  
 67 lower limit of the reaction rate coefficient of the reaction of RO<sub>2</sub> with NO,  $7.7 \times 10^{-12} \text{ cm}^3 \text{ s}^{-1}$  (at 298  
 68 K for CH<sub>3</sub>O<sub>2</sub>) to calculate the turnover rate of this reaction. Grey areas indicate the 1 $\sigma$  uncertainty derived  
 69 from experimental errors of the measured quantities (Table 2) and of the reaction rate constants (Table 1).

70

71

72

73

74

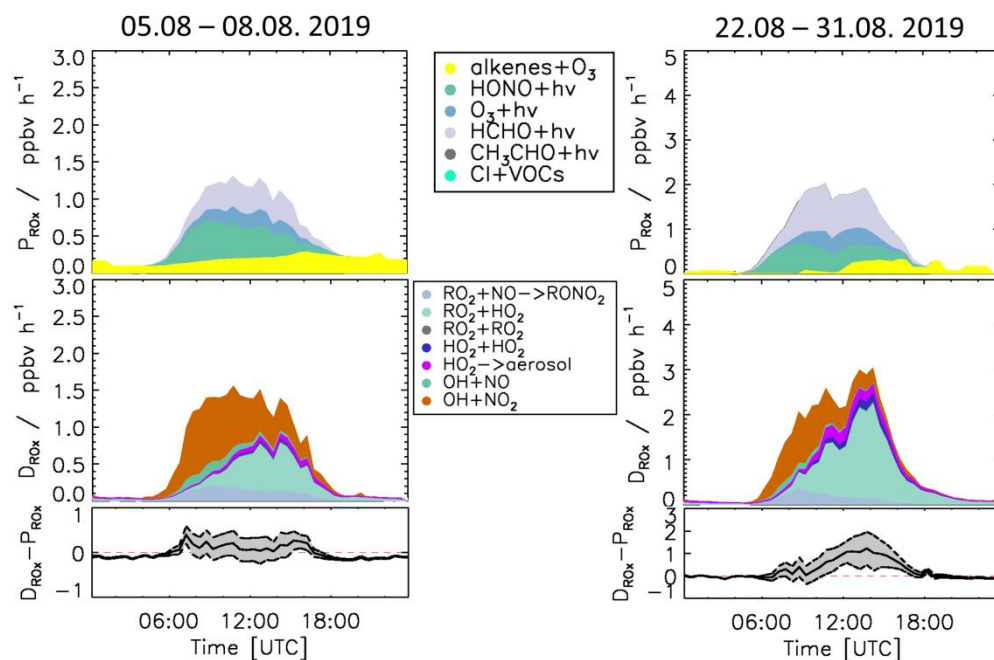

76 **Figure S7:** Experimental budgets for  $RO_x$  similar to Figure 11 (Case 1 and 2), using the high limits of alkene  
 77 concentrations contributing to radical production by ozonolysis reactions and applying the  $HO_2$  uptake on the  
 78 aerosols (Section 4.2). Grey areas indicate the  $1\sigma$  uncertainty derived from experimental errors of the measured  
 79 quantities (Table 2) and of the reaction rate constants (Table 1).
